# Supplementary material for: Investigating the Effects of Loading Factors on the In Vitro Pharmaceutical Performance of Mesoporous Materials as Drug Carriers for Ibuprofen
Source: Materials (Basel). 2017 Feb 9;10(2):150. doi: 10.3390/ma10020150 (PMC5459193; doi:10.3390/ma10020150)
Supplement: Supplementary file 1 [file materials-10-00150-s001.pdf]

# Supplementary Materials: Investigating the Effects of Loading Factors on the In Vitro Pharmaceutical Performance of Mesoporous Materials as Drug Carriers for Ibuprofen

Junmin Lai, Wu Lin, Peter Scholes and Mingzhong Li

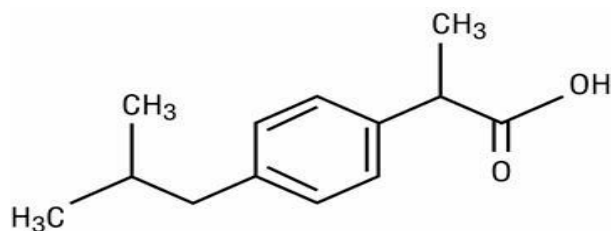

(a)

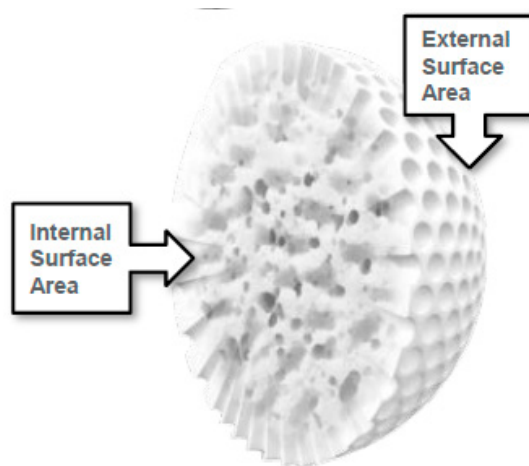

(b)

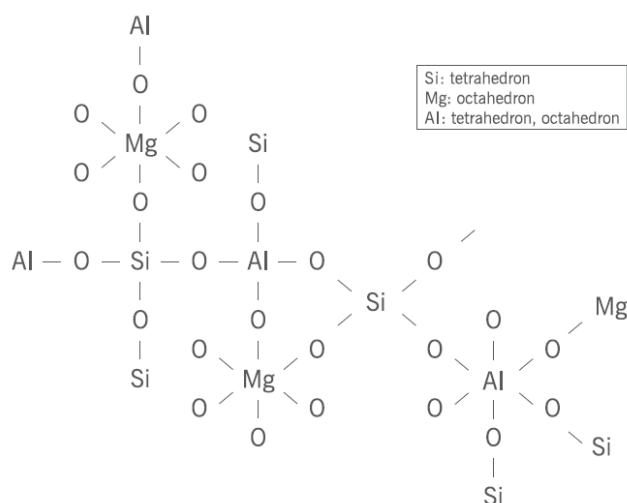

(c)

**Figure S1.** Structures of: (a) ibuprofen; (b) Silica SYLOID® 244FP; and (c) Neusilin® US2.

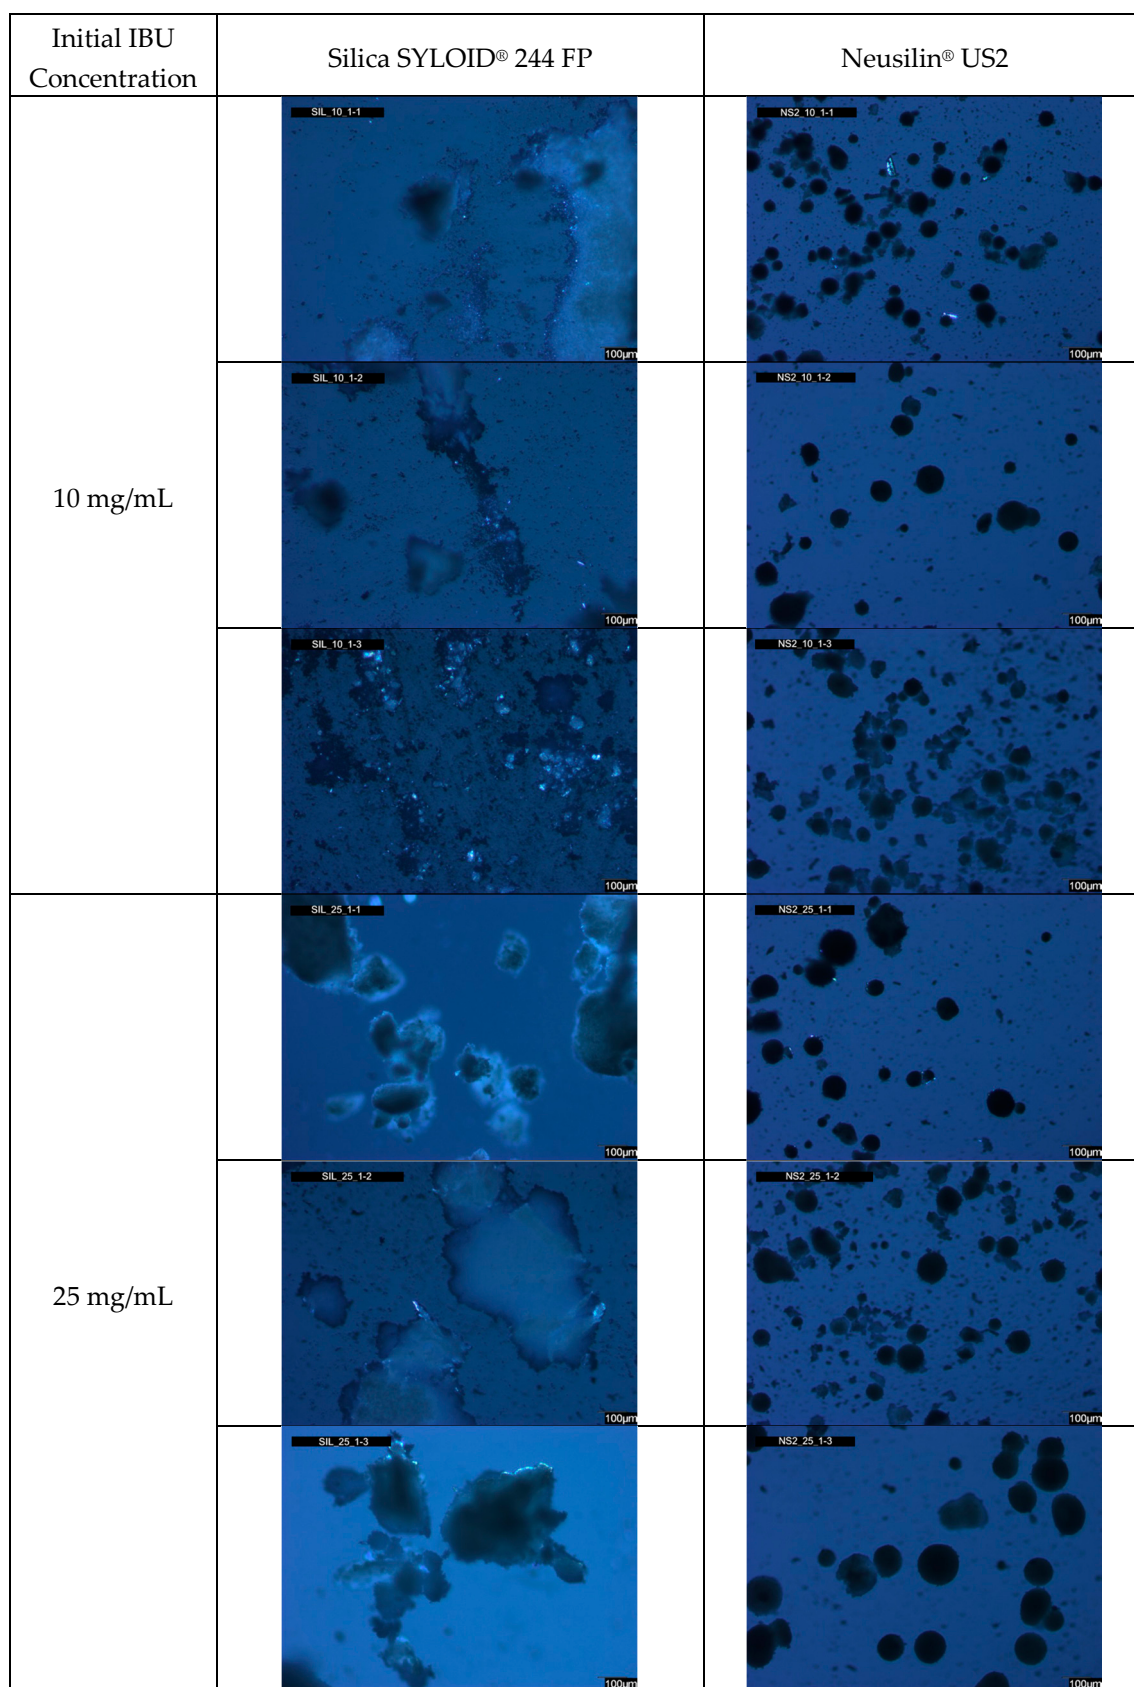

Figure S2. Cont.

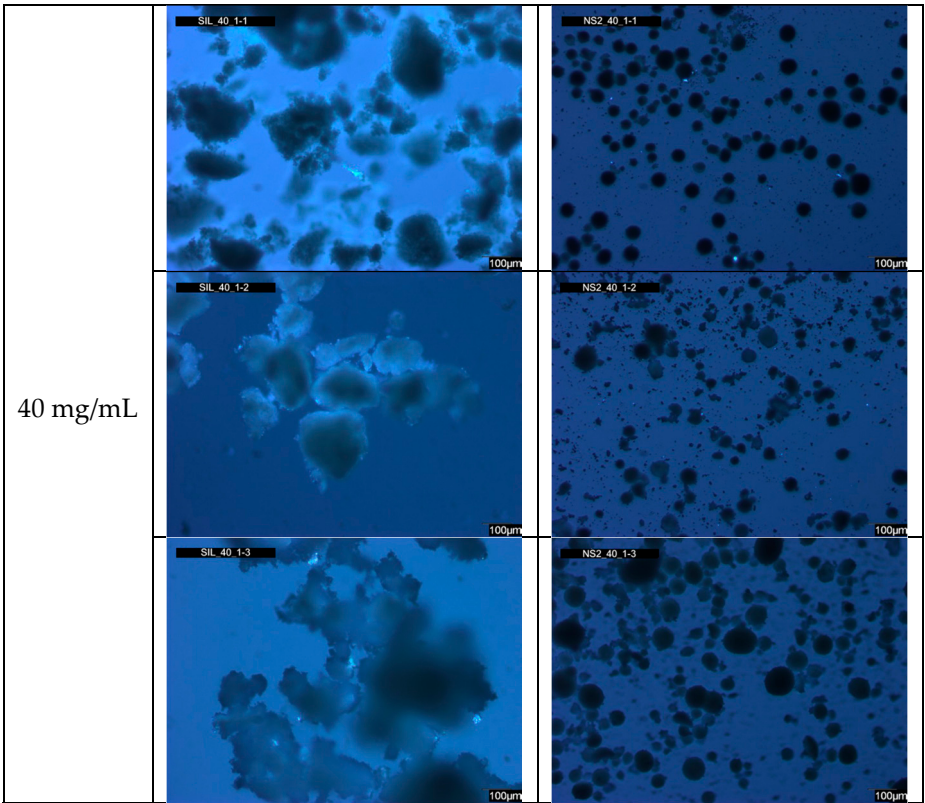

Figure S2. Images of the ibuprofen (IBU)-loaded samples.

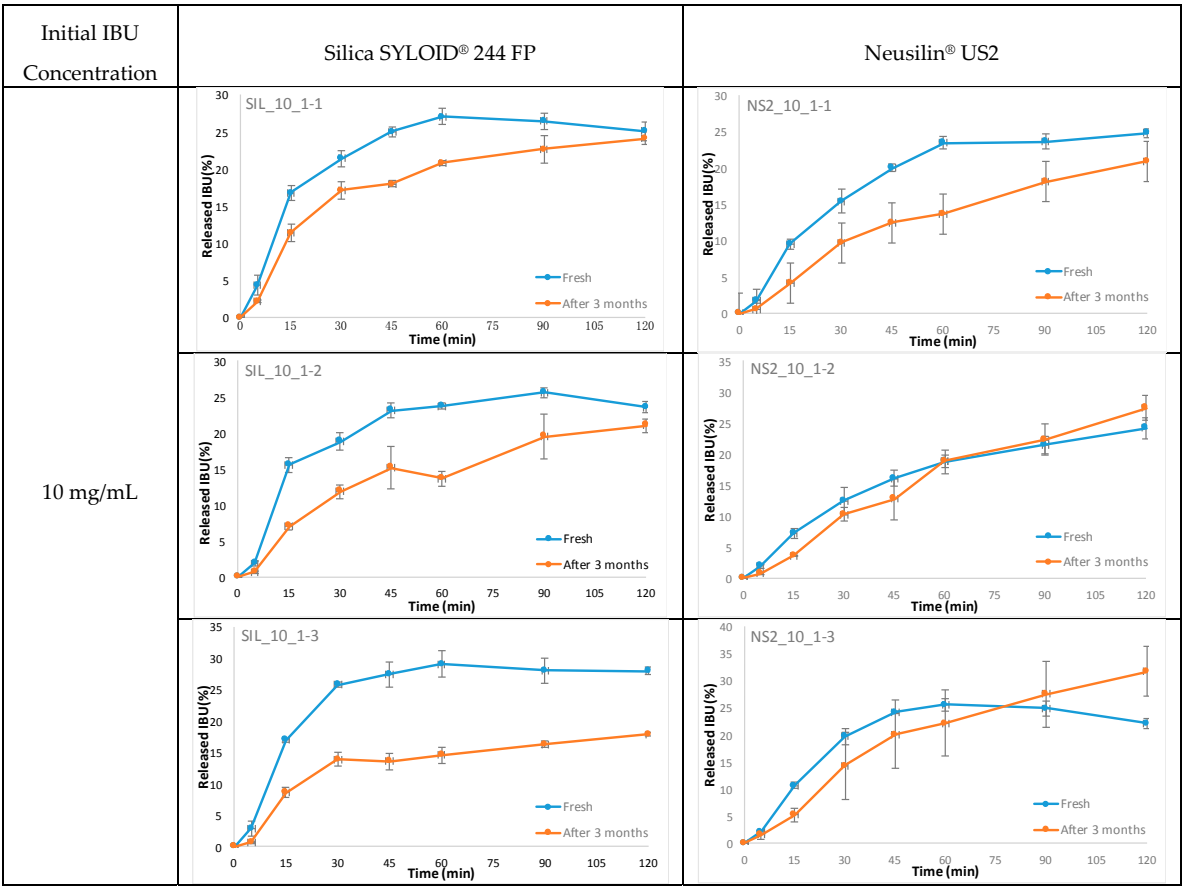

Figure S3. Cont.

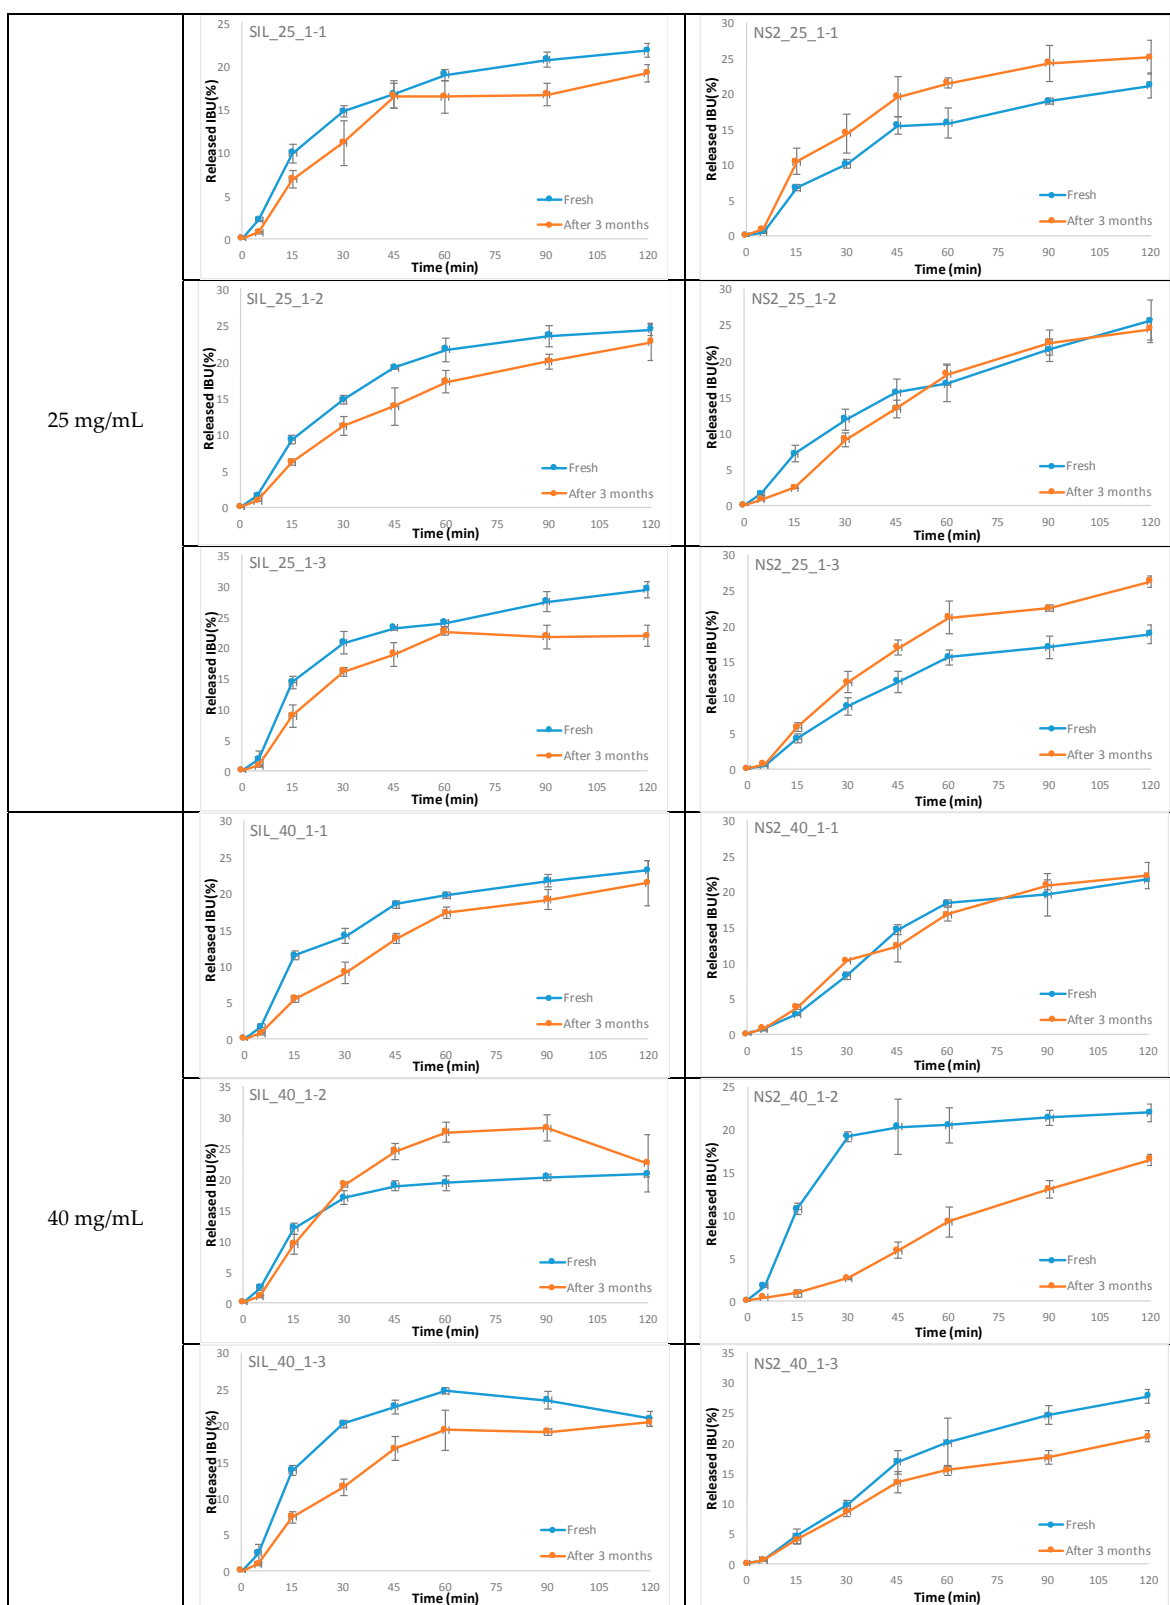

**Figure S3.** Comparison of the dissolution profiles of the drug-loaded samples of fresh and after three months of storage.
